# Supplementary material for: Rates of Follow-up Colonoscopy After a Positive Stool-Based Screening Test Result for Colorectal Cancer Among Health Care Organizations in the US, 2017-2020
Source: PubMed Central journal article supplement — JAMA Netw Open. 2023 Jan 18;6(1):e2251384. doi: 10.1001/jamanetworkopen.2022.51384 (PMC9856942; doi:10.1001/jamanetworkopen.2022.51384), 2023-01-18
Supplement: jamanetwopen-e2251384-s001.pdf [file jamanetwopen-e2251384-s001.pdf]

## Supplementary Online Content

Mohl JT, Ciemins EL, Miller-Wilson LA, Gillen A, Luo R, Colangelo F. Rates of follow-up colonoscopy after a positive stool-based screening test result for colorectal cancer among health care organizations in the US, 2017-2020. *JAMA Netw Open*. 2023;6(1):e2251384. doi:10.1001/jamanetworkopen.2022.51384

**eTable 1.** Sensitivity Analysis Using Adjudicated Claims Data

**eTable 2.** Coefficients of HCO Identity for Cox Model

**eTable 3.** Unadjusted FU-CY Rates for Select Characteristics

**eTable 4.** Cox Proportional Hazard Sensitivity Analysis Excluding COVID Period

**eTable 5.** Comparison of Index Years 2019 and 2020 Assessing COVID-19 Impact

**eAppendix 1.** Exclusionary ICD-9 and ICD-10 Codes for Patients Not at Above-Average Risk

**eAppendix 2.** Colonoscopy Procedure Codes

**eAppendix 3.** AMGA Colorectal Cancer Screening and Follow-up Interview Guide

This supplementary material has been provided by the authors to give readers additional information about their work.

**eTable 1. Sensitivity analysis using adjudicated claims data**

| Follow up | All patients |                  |             | With adjudicated claims |                  |             |
|-----------|--------------|------------------|-------------|-------------------------|------------------|-------------|
|           | n            | % FU-CY (95% CI) |             | n                       | % FU-CY (95% CI) |             |
| 90-day    | 18,560       | 43.3             | (42.7-43.8) | 1603                    | 54.0             | (52.3-55.6) |
| 180-day   | 15,159       | 51.4             | (50.8-51.9) | 1260                    | 63.1             | (61.5-64.7) |
| 360-day   | 12,284       | 56.1             | (55.6-56.7) | 1024                    | 68.7             | (67.1-70.2) |

**eTable 2. Coefficients of HCO identity for Cox model**

| <b>HCO ID</b> |  | <b>HR (95% CI)</b> |             |
|---------------|--|--------------------|-------------|
| 1             |  | Reference          |             |
| 2             |  | 1.06               | (1.26-0.89) |
| 3             |  | 1.40               | (1.86-1.05) |
| 4             |  | 1.08               | (1.34-0.88) |
| 5             |  | 0.84               | (1.06-0.67) |
| 6             |  | 0.90               | (1.34-0.60) |
| 7             |  | 1.42               | (1.75-1.16) |
| 8             |  | 1.08               | (1.36-0.86) |
| 9             |  | 0.86               | (0.99-0.74) |
| 10            |  | 0.92               | (1.07-0.80) |
| 11            |  | 0.70               | (0.84-0.59) |
| 12            |  | 0.81               | (1.14-0.57) |
| 13            |  | 0.86               | (1.05-0.70) |
| 14            |  | 1.05               | (1.26-0.88) |
| 15            |  | 0.66               | (0.84-0.51) |
| 16            |  | 0.75               | (0.91-0.63) |
| 17            |  | 1.18               | (1.42-0.99) |
| 18            |  | 0.52               | (0.64-0.43) |
| 19            |  | 0.52               | (0.72-0.38) |
| 20            |  | 0.89               | (1.07-0.74) |
| 21            |  | 1.61               | (1.99-1.31) |
| 22            |  | 0.95               | (1.09-0.82) |
| 23            |  | 0.99               | (1.16-0.84) |
| 24            |  | 0.48               | (0.57-0.39) |
| 25            |  | 0.80               | (0.93-0.69) |
| 26            |  | 0.75               | (0.92-0.62) |
| 27            |  | 0.26               | (0.40-0.17) |
| 28            |  | 1.13               | (1.45-0.88) |
| 29            |  | 1.67               | (2.26-1.24) |
| 30            |  | 1.36               | (1.80-1.03) |
| 31            |  | 0.78               | (0.98-0.63) |
| 32            |  | 1.14               | (1.34-0.96) |
| 33            |  | 0.73               | (0.99-0.54) |
| 34            |  | 0.75               | (1.04-0.54) |
| 35            |  | 1.07               | (1.28-0.90) |
| 36            |  | 1.27               | (1.49-1.07) |
| 37            |  | 0.84               | (1.01-0.70) |
| 38            |  | 1.08               | (1.24-0.95) |
| 39            |  | 2.07               | (2.73-1.58) |

**eTable 3. Unadjusted FU-CY Rates for Select Characteristics**

| <b>Characteristic at index date</b> | <b>Time Interval</b> | <b>FU-CY</b> | <b>95% CI</b> |
|-------------------------------------|----------------------|--------------|---------------|
| Overall                             | 90                   | 43.3%        | (42.7%-43.8%) |
| Overall                             | 180                  | 51.4%        | (50.8%-51.9%) |
| Overall                             | 360                  | 56.1%        | (55.6%-56.7%) |
| RACE=Caucasian                      | 90                   | 44.4%        | (43.9%-45.0%) |
| RACE=African American               | 90                   | 33.9%        | (31.8%-35.9%) |
| RACE=Asian                          | 90                   | 34.0%        | (29.6%-38.2%) |
| RACE=Other/Unknown                  | 90                   | 36.1%        | (33.5%-38.6%) |
| RACE=Caucasian                      | 180                  | 52.5%        | (52.0%-53.1%) |
| RACE=African American               | 180                  | 42.9%        | (40.7%-45.0%) |
| RACE=Asian                          | 180                  | 40.7%        | (36.1%-45.0%) |
| RACE=Other/Unknown                  | 180                  | 43.3%        | (40.6%-45.9%) |
| RACE=Caucasian                      | 360                  | 57.2%        | (56.6%-57.7%) |
| RACE=African American               | 360                  | 49.0%        | (46.8%-51.1%) |
| RACE=Asian                          | 360                  | 46.2%        | (41.4%-50.6%) |
| RACE=Other/Unknown                  | 360                  | 48.7%        | (46.0%-51.3%) |
| ETHNICITY=Not Hispanic              | 90                   | 44.0%        | (43.4%-44.5%) |
| ETHNICITY=Hispanic                  | 90                   | 35.2%        | (31.9%-38.4%) |
| ETHNICITY=Unknown                   | 90                   | 35.5%        | (33.3%-37.6%) |
| ETHNICITY=Not Hispanic              | 180                  | 52.1%        | (51.6%-52.7%) |
| ETHNICITY=Hispanic                  | 180                  | 43.8%        | (40.3%-47.1%) |
| ETHNICITY=Unknown                   | 180                  | 42.7%        | (40.4%-44.8%) |
| ETHNICITY=Not Hispanic              | 360                  | 56.8%        | (56.2%-57.3%) |
| ETHNICITY=Hispanic                  | 360                  | 50.3%        | (46.7%-53.6%) |
| ETHNICITY=Unknown                   | 360                  | 48.6%        | (46.3%-50.8%) |
| INDEX_TEST=FIT                      | 90                   | 36.0%        | (35.3%-36.7%) |
| INDEX_TEST=mt-sDNA                  | 90                   | 53.4%        | (52.6%-54.2%) |
| INDEX_TEST=FIT                      | 180                  | 43.7%        | (43.0%-44.4%) |
| INDEX_TEST=mt-sDNA                  | 180                  | 62.1%        | (61.3%-62.9%) |
| INDEX_TEST=FIT                      | 360                  | 48.7%        | (47.9%-49.4%) |
| INDEX_TEST=mt-sDNA                  | 360                  | 66.6%        | (65.8%-67.4%) |

**eTable 4. Cox Proportional Hazard sensitivity analysis excluding COVID period**

| Characteristic at index date                                                                                                                            |                       | HR (95% CI) |             |
|---------------------------------------------------------------------------------------------------------------------------------------------------------|-----------------------|-------------|-------------|
| Age (years)                                                                                                                                             |                       | Reference   |             |
|                                                                                                                                                         | 50-59                 | Reference   |             |
|                                                                                                                                                         | 60-69                 | 0.99        | (0.95-1.03) |
|                                                                                                                                                         | 70-75                 | 0.98        | (0.93-1.02) |
| Gender                                                                                                                                                  |                       | Reference   |             |
|                                                                                                                                                         | Female                | Reference   |             |
|                                                                                                                                                         | Male                  | 1.00        | (0.97-1.03) |
| Race                                                                                                                                                    |                       | Reference   |             |
|                                                                                                                                                         | Caucasian             | Reference   |             |
|                                                                                                                                                         | African American      | 0.87        | (0.81-0.93) |
|                                                                                                                                                         | Asian                 | 0.82        | (0.71-0.95) |
|                                                                                                                                                         | Other                 | 0.93        | (0.85-1.03) |
| Ethnicity                                                                                                                                               |                       | Reference   |             |
|                                                                                                                                                         | Not Hispanic          | Reference   |             |
|                                                                                                                                                         | Hispanic              | 0.90        | (0.80-1.01) |
|                                                                                                                                                         | Unknown               | 0.93        | (0.85-1.01) |
| Insurance status                                                                                                                                        |                       | Reference   |             |
|                                                                                                                                                         | Commercial            | Reference   |             |
|                                                                                                                                                         | Medicaid              | 0.79        | (0.73-0.85) |
|                                                                                                                                                         | Medicare              | 0.95        | (0.91-1.00) |
|                                                                                                                                                         | Other                 | 0.87        | (0.61-0.83) |
|                                                                                                                                                         | Unknown               | 0.71        | (0.76-1.00) |
| Smoking status                                                                                                                                          |                       | Reference   |             |
|                                                                                                                                                         | Never smoked          | Reference   |             |
|                                                                                                                                                         | Current smoker        | 0.90        | (0.86-0.94) |
|                                                                                                                                                         | Not currently smoking | 1.05        | (0.98-1.12) |
|                                                                                                                                                         | Previously smoked     | 0.99        | (0.95-1.03) |
|                                                                                                                                                         | Unknown               | 0.89        | (0.82-0.96) |
| Prior SBT use                                                                                                                                           |                       | Reference   |             |
|                                                                                                                                                         | No                    | Reference   |             |
|                                                                                                                                                         | Yes                   | 1.13        | (1.08-1.18) |
| Index year                                                                                                                                              |                       | Reference   |             |
|                                                                                                                                                         | 2017                  | Reference   |             |
|                                                                                                                                                         | 2018                  | 1.00        | (0.96-1.04) |
|                                                                                                                                                         | 2019                  | 0.91        | (0.87-0.95) |
| SBT type                                                                                                                                                |                       | Reference   |             |
|                                                                                                                                                         | FIT                   | Reference   |             |
|                                                                                                                                                         | mt-sDNA               | 1.65        | (1.60-1.72) |
| CCI levels                                                                                                                                              |                       | Reference   |             |
|                                                                                                                                                         | 0                     | Reference   |             |
|                                                                                                                                                         | 1-2                   | 0.90        | (0.87-0.94) |
|                                                                                                                                                         | 3-4                   | 0.73        | (0.68-0.77) |
|                                                                                                                                                         | 5+                    | 0.63        | (0.57-0.70) |
| Note: Excludes patients with index date later than Sep. 2019<br>Abbreviations: HR, Hazard ratio; SBT, stool-based test; CCI, Charlson Comorbidity Index |                       |             |             |

**eTable 5. Comparison of index years 2019 and 2020 assessing COVID-19 impact**

| <b>90-day</b>                      |     |                  |             |                                |                  |             |       |
|------------------------------------|-----|------------------|-------------|--------------------------------|------------------|-------------|-------|
| <b>Pre-COVID (Nov 18 - Jun 19)</b> |     |                  |             | <b>COVID (Nov 19 - Jun 20)</b> |                  |             |       |
| Index month                        | n   | % FU-CY (95% CI) |             | n                              | % FU-CY (95% CI) |             | p     |
| Nov                                | 478 | 45.6             | (42.2-48.8) | 448                            | 45.0             | (41.5-48.3) | 0.85  |
| Dec                                | 477 | 49.0             | (45.6-52.0) | 414                            | 45.0             | (41.4-48.5) | 0.25  |
| Jan                                | 456 | 47.4             | (44.0-50.6) | 445                            | 36.7             | (33.1-40.2) | 0.01  |
| Feb                                | 443 | 50.1             | (46.7-53.3) | 478                            | 28.3             | (24.8-31.7) | <0.01 |
| Mar                                | 558 | 47.8             | (44.7-50.7) | 395                            | 20.5             | (16.9-24.0) | <0.01 |
| Apr                                | 587 | 47.5             | (44.5-50.3) | 154                            | 32.8             | (26.4-38.6) | 0.01  |
| May                                | 687 | 45.4             | (42.6-48.1) | 195                            | 38.5             | (32.9-43.6) | 0.09  |
| Jun                                | 568 | 44.6             | (41.5-47.6) | 252                            | 47.0             | (42.3-51.3) | 0.53  |
| <b>180-day</b>                     |     |                  |             |                                |                  |             |       |
| <b>Pre-COVID (Nov 18 - Jun 19)</b> |     |                  |             | <b>COVID (Nov 19 - Jun 20)</b> |                  |             |       |
| Index month                        | n   | FU-CY (95 CI)    |             | n                              | FU-CY (95 CI)    |             | p     |
| Nov                                | 397 | 53.5             | (50.5-56.7) | 396                            | 50.2             | (46.6-53.5) | 0.35  |
| Dec                                | 402 | 56.0             | (52.7-59.0) | 377                            | 48.5             | (44.7-52.0) | 0.04  |
| Jan                                | 392 | 53.4             | (49.9-56.6) | 394                            | 43.2             | (39.4-46.7) | 0.01  |
| Feb                                | 360 | 57.5             | (54.2-60.7) | 373                            | 42.6             | (38.7-46.3) | <0.01 |
| Mar                                | 440 | 55.9             | (52.8-58.8) | 318                            | 34.8             | (30.5-38.9) | <0.01 |
| Apr                                | 449 | 55.8             | (52.8-58.7) | 118                            | 44.0             | (37.2-50.2) | 0.02  |
| May                                | 537 | 53.6             | (50.8-56.3) | 163                            | 44.4             | (38.7-49.6) | 0.04  |
| Jun                                | 422 | 53.8             | (50.6-56.7) | 194                            | 55.6             | (50.9-59.9) | 0.67  |
| <b>360-day</b>                     |     |                  |             |                                |                  |             |       |
| <b>Pre-COVID (Nov 18 - Jun 19)</b> |     |                  |             | <b>COVID (Nov 19 - Jun 20)</b> |                  |             |       |
| Index month                        | n   | FU-CY (95 CI)    |             | n                              | FU-CY (95 CI)    |             | p     |
| Nov                                | 307 | 58.9             | (55.5-62.1) | 319                            | 56.2             | (52.7-59.5) | 0.49  |
| Dec                                | 316 | 60.7             | (57.4-63.4) | 302                            | 54.6             | (50.9-58.1) | 0.12  |
| Jan                                | 293 | 58.2             | (54.7-61.3) | 313                            | 50.3             | (46.4-53.9) | 0.05  |
| Feb                                | 283 | 61.1             | (57.8-64.2) | 282                            | 49.8             | (45.8-53.5) | 0.01  |
| Mar                                | 321 | 59.4             | (56.3-62.3) | 235                            | 44.0             | (39.4-48.3) | <0.01 |
| Apr                                | 354 | 60.0             | (57.0-62.8) | 70                             | 49.2             | (42.1-55.4) | 0.09  |
| May                                | 428 | 57.5             | (54.6-60.2) | 100                            | 50.7             | (44.7-56.0) | 0.22  |
| Jun                                | 345 | 57.1             | (53.9-60.1) | 88                             | 58.7             | (53.9-63.0) | 0.78  |

**eAppendix 1.** Exclusionary ICD-9 and ICD-10 Codes for Patients Not at Above-Average Risk

Patients not at average risk, and excluded from the current study, had the following codes associated with their screening test or procedure:

| <b>Code</b> | <b>Description</b>                                                                |
|-------------|-----------------------------------------------------------------------------------|
| ICD-9       |                                                                                   |
| V12.72      | Personal history of colonic polyps                                                |
| V10.05      | Personal history of malignant neoplasm of the large colon                         |
| V10.06      | Personal history of malignant neoplasm of the rectum, rectosigmoid junction, anus |
| V16.0       | Family history of malignant neoplasm of the gastrointestinal tract                |
| V84.09      | Genetic susceptibility to other malignant neoplasm (includes lynch syndrome)      |
| 153         | Malignant neoplasm of colon                                                       |
| 153.0       | Malignant neoplasm of hepatic flexure                                             |
| 153.1       | Malignant neoplasm of transverse colon                                            |
| 153.2       | Malignant neoplasm of descending colon                                            |
| 153.3       | Malignant neoplasm of sigmoid colon                                               |
| 153.4       | Malignant neoplasm of cecum                                                       |
| 153.5       | Malignant neoplasm of appendix vermiformis                                        |
| 153.6       | Malignant neoplasm of ascending colon                                             |
| 153.7       | Malignant neoplasm of splenic flexure                                             |
| 153.8       | Malignant neoplasm of other specified sites of large intestine                    |
| 153.9       | Malignant neoplasm of colon, unspecified                                          |
| 154         | Malignant neoplasm of rectum, rectosigmoid junction, and anus                     |
| 154.0       | Malignant neoplasm of rectosigmoid junction                                       |
| 154.1       | Malignant neoplasm of rectum                                                      |
| 154.8       | Malignant neoplasm of other sites of rectum, rectosigmoid junction, and anus      |
| 230.3       | Carcinoma in situ of colon                                                        |
| 230.4       | Carcinoma in situ of rectum                                                       |
| 211.3       | Benign neoplasm of colon (includes Familial Adenomatous Polyposis)                |
| 211.4       | Benign neoplasm of rectum and anal canal                                          |
| 229.9       | Benign neoplasm, unspecified site                                                 |
| 238.9       | Neoplasm of uncertain behavior, unspecified                                       |
| 569.0       | Anal and rectal polyp                                                             |
| 569.49      | Other specified disorders of rectum and anus (includes fibroepithelial polyp)     |
| 555         | Regional enteritis                                                                |
| 555.0       | Crohn's disease (inflammatory bowel disease)                                      |
| 555.1       | Crohn's disease (inflammatory bowel disease),                                     |
| 555.2       | Crohn's disease (inflammatory bowel disease)                                      |
| 555.9       | Crohn's disease (inflammatory bowel disease)                                      |
| 556         | Ulcerative proctocolitis                                                          |

|             |                                                                                  |
|-------------|----------------------------------------------------------------------------------|
| 556.0-556.9 | Ulcerative Colitis                                                               |
| 578.1       | Stool contents: occult blood in stool                                            |
| 792.1       | Stool contents: abnormal substance in stool                                      |
| ICD-10      |                                                                                  |
| K50.00      | Crohn's disease of small intestine without complications                         |
| K50.011     | Crohn's disease of small intestine with rectal bleeding                          |
| K50.012     | Crohn's disease of small intestine with intestinal obstruction                   |
| K50.013     | Crohn's disease of small intestine with fistula                                  |
| K50.014     | Crohn's disease of small intestine with abscess                                  |
| K50.018     | Crohn's disease of small intestine with other complication                       |
| K50.019     | Crohn's disease of small intestine with unspecified complications                |
| K50.811     | Crohn's disease of both small and large intestine with rectal bleeding           |
| K50.812     | Crohn's disease of both small and large intestine with intestinal obstruction    |
| K50.813     | Crohn's disease of both small and large intestine with fistula                   |
| K50.814     | Crohn's disease of both small and large intestine with abscess                   |
| K50.818     | Crohn's disease of both small and large intestine with other complication        |
| K50.819     | Crohn's disease of both small and large intestine with unspecified complications |
| K51.011     | Ulcerative (chronic) pancolitis with rectal bleeding                             |
| K51.012     | Ulcerative (chronic) pancolitis with intestinal obstruction                      |
| K51.013     | Ulcerative (chronic) pancolitis with fistula                                     |
| K51.014     | Ulcerative (chronic) pancolitis with abscess                                     |
| K51.018     | Ulcerative (chronic) pancolitis with other complication                          |
| K51.019     | Ulcerative (chronic) pancolitis with unspecified complications                   |
| K51.211     | Ulcerative (chronic) proctitis with rectal bleeding                              |
| K51.212     | Ulcerative (chronic) proctitis with intestinal obstruction                       |
| K51.213     | Ulcerative (chronic) proctitis with fistula                                      |
| K51.214     | Ulcerative (chronic) proctitis with abscess                                      |
| K51.218     | Ulcerative (chronic) proctitis with other complication                           |
| K51.219     | Ulcerative (chronic) proctitis with unspecified complications                    |
| K51.40      | Inflammatory polyps of colon without complications                               |
| K51.411     | Inflammatory polyps of colon with rectal bleeding                                |
| K51.412     | Inflammatory polyps of colon with intestinal obstruction                         |
| K51.413     | Inflammatory polyps of colon with fistula                                        |
| K51.414     | Inflammatory polyps of colon with abscess                                        |
| K51.418     | Inflammatory polyps of colon with other complication                             |
| K51.419     | Inflammatory polyps of colon with unspecified complications                      |
| K51.50      | Left sided colitis without complications                                         |
| K51.511     | Left sided colitis with rectal bleeding                                          |
| K51.512     | Left sided colitis with intestinal obstruction                                   |
| K51.513     | Left sided colitis with fistula                                                  |
| K51.514     | Left sided colitis with abscess                                                  |
| K51.518     | Left sided colitis with other complication                                       |
| K51.519     | Left sided colitis with unspecified complications                                |
| K51.80      | Other ulcerative colitis without complications                                   |



|         |                                                                         |
|---------|-------------------------------------------------------------------------|
| K51.811 | Other ulcerative colitis with rectal bleeding                           |
| K51.812 | Other ulcerative colitis with intestinal obstruction                    |
| K51.813 | Other ulcerative colitis with fistula                                   |
| K51.814 | Other ulcerative colitis with abscess                                   |
| K51.818 | Other ulcerative colitis with other complication                        |
| K51.819 | Other ulcerative colitis with unspecified complications                 |
| K52.8   | Other specified noninfective gastroenteritis and colitis                |
| K62.1   | Rectal polyp                                                            |
| K62.5   | Hematochezia                                                            |
| K50.8   | Crohn's disease of small and large intestine without complication       |
| K50.10  | Crohn's disease of large intestine without complication                 |
| K50.11  | Crohn's disease of large intestine                                      |
| K50.111 | Crohn's disease of large intestine with rectal bleeding                 |
| K50.112 | Crohn's disease of large intestine with intestinal obstruction          |
| K50.113 | Crohn's disease of large intestine with fistula                         |
| K50.114 | Crohn's disease of large intestine with abscess                         |
| K50.118 | Crohn's disease of large intestine with other complication              |
| K50.119 | Crohn's disease of large intestine with unspecified complications       |
| K50.80  | Crohn's disease of both small and large intestine without complications |
| K50.90  | Crohn's disease, unspecified, without complications                     |
| K50.911 | Crohn's disease, unspecified, with rectal bleeding                      |
| K50.912 | Crohn's disease, unspecified, with intestinal obstruction               |
| K50.913 | Crohn's disease, unspecified, with fistula                              |
| K50.914 | Crohn's disease, unspecified, with abscess                              |
| K50.918 | Crohn's disease, unspecified, with other complication                   |
| K50.919 | Crohn's disease, unspecified, with unspecified complications            |
| K51.00  | Ulcerative (chronic) pancolitis without complications                   |
| K51.90  | Ulcerative colitis, unspecified, without complication                   |
| K51.911 | Ulcerative colitis, unspecified with rectal bleeding                    |
| K51.912 | Ulcerative colitis, unspecified with intestinal obstruction             |
| K51.913 | Ulcerative colitis, unspecified with fistula                            |
| K51.914 | Ulcerative colitis, unspecified with abscess                            |
| K51.918 | Ulcerative colitis, unspecified with other complication                 |
| K51.919 | Ulcerative colitis, unspecified with unspecified complications          |
| K51.20  | Ulcerative (chronic) proctitis                                          |
| K51.3   | Ulcerative (chronic) rectosigmoiditis                                   |
| K51.30  | Ulcerative (chronic) rectosigmoiditis without complications             |
| K51.311 | Ulcerative (chronic) rectosigmoiditis with rectal bleeding              |
| K51.312 | Ulcerative (chronic) rectosigmoiditis with intestinal obstruction       |
| K51.313 | Ulcerative (chronic) rectosigmoiditis with fistula                      |
| K51.314 | Ulcerative (chronic) rectosigmoiditis with abscess                      |
| K51.318 | Ulcerative (chronic) rectosigmoiditis with other complication           |
| K51.319 | Ulcerative (chronic) rectosigmoiditis with unspecified complications    |
| K92.1   | Melena                                                                  |
| R19.5   | Other fecal abnormalities (FOBT/FIT positives, occult blood)            |

|         |                                                                                                                          |
|---------|--------------------------------------------------------------------------------------------------------------------------|
| Z86.01  | Personal history of adenoma/colonic polyps                                                                               |
| Z86.010 | Personal history of colonic polyps                                                                                       |
| Z85.09  | Personal history of malignant neoplasm digestive tract                                                                   |
| Z15.09  | Genetic susceptibility to other malignant neoplasm                                                                       |
| C18.0   | Malignant neoplasm of cecum                                                                                              |
| C18.1   | Malignant neoplasm of appendix                                                                                           |
| C18.3   | Malignant neoplasm of hepatic flexure                                                                                    |
| C18.5   | Malignant neoplasm of splenic flexure                                                                                    |
| C18.7   | Malignant neoplasm of sigmoid colon                                                                                      |
| C18.2   | Malignant neoplasm of ascending colon                                                                                    |
| C18.4   | Malignant neoplasm of transverse colon                                                                                   |
| C18.6   | Malignant neoplasm of descending colon                                                                                   |
| C18.8   | Malignant neoplasm of overlapping sites of colon                                                                         |
| C18.9   | Malignant neoplasm of the colon, unspecified                                                                             |
| C19     | Malignant neoplasm of rectosigmoid junction                                                                              |
| C20     | Malignant neoplasm of rectum                                                                                             |
| C21.2   | Malignant neoplasm of cloacogenic zone                                                                                   |
| C21.8   | Malignant neoplasm of overlapping sites of rectum, anus and anal canal                                                   |
| D01.0   | Carcinoma in situ of colon                                                                                               |
| D01.1   | Carcinoma in situ of rectosigmoid junction                                                                               |
| D01.2   | Carcinoma in situ of rectum                                                                                              |
| D01.40  | Carcinoma in situ of unspecified part of intestine                                                                       |
| D01.49  | Carcinoma in situ of other parts of intestine                                                                            |
| D12.6   | Adenomatous polyp of colon (benign neoplasm of colon, unspecified)<br>includes familial adenomatous polyposis/hereditary |
| D12.0   | Benign neoplasm of cecum (includes familial polyposis)                                                                   |
| D12.1   | Benign neoplasm of appendix (includes familial polyposis)                                                                |
| D12.4   | Benign neoplasm of ascending colon                                                                                       |
| D12.3   | Benign neoplasm of transverse colon                                                                                      |
| D12.2   | Benign neoplasm of descending colon                                                                                      |
| D12.5   | Benign neoplasm of sigmoid colon                                                                                         |
| D12.7   | Benign neoplasm of rectosigmoid junction (includes familial polyposis)                                                   |
| D12.8   | Benign neoplasm of rectum                                                                                                |
| D36.9   | Benign neoplasm, unspecified site                                                                                        |
| D48.9   | Neoplasm of uncertain behavior, unspecified                                                                              |

## **eAppendix 2.** Colonoscopy Procedure Codes

Colonoscopy CPT/HCPCS codes:

- CPT/HCPCS – 44388, 44389, 44390, 44391, 44392, 44393, 44394, 44397, 44401, 44402, 44403, 44404, 44405, 44406, 44407, 44408, 45355, 45378, 45379, 45380, 45381, 45382, 45383, 45384, 45385, 45386, 45387, 45388, 45389, 45390, 45391, 45392, 45393, 45398, G0105, G0120, G0121

Flexible Sigmoidoscopy CPT/HCPCS codes:

- 45330, 45331, 45332, 45333, 45334, 45335, 45337, 45338, 45339, 45340, 45341, 45342, 45345, 45346, 45347, 45349, 45350, G0104, G0106

CT Colonography CPT codes:

- 74261, 74262, 74263

## **eAppendix 3. AMGA Colorectal Cancer Screening and Follow-up Interview Guide**

### AMGA Colorectal Cancer Screening and Follow-up *Interview Guide*

#### Introduction

The purpose of this research is to better understand how providers and other clinic staff approach colorectal cancer screening follow-up and barriers to timely colonoscopy after a positive stool-based test. This interview is being conducted by AMGA, a health care trade association of which your organization is a member. You have been identified as a provider with knowledge of this topic. Your input is extremely valuable to this study and will contribute to improving the care for patients at risk for colorectal cancer (CRC). The interview will take up to 90 minutes. An honorarium in the amount of \$500 will be provided for participation in the interview.

Your participation in this study is voluntary. Your responses will be treated confidentially, and any findings will be shared in a de-identified, aggregated format. We are requesting to record this interview to aid in the research. The recording will be deleted after research is completed, and no comments will be directly attributed back to you unless we specifically obtain your consent in advance to do so. The information you share in the interview will be stored in a password protected file to which only AMGA will have access. Any data which is shared with the project funder and any published data will be aggregated and de-identified.

Please do not respond to any of these questions with patient identifiable information. None of the responses require any MRNs, patient names, or other identifiers.

*At this point, the researcher will request consent to proceed and to record the interview.*

#### Background

1. Please describe your current role at your organization.
2. How many years have you been practicing (or working at organization if non-provider)?
3. About how many patients do you see per week?
4. About how many patients do you discuss CRC screening with per week?
5. How do you (or your organization) approach preventive services like cancer screening and immunizations? Do you discuss with patients directly or does another staff member discuss?
6. How does the computer help or hinder you in preventive service reminders?
7. Does your organization or clinic practice have any specific guidelines or recommendations around CRC cancer screening and how are they communicated to patients?
8. Do you discuss cancer screening, CRC in particular, with your partners (if provider) or with other staff/team members at your organization (if non-provider)?

## Colorectal Cancer Screening

9. What CRC screening options are communicated to patients, and are some preferentially recommended?
10. Do you use stool-based screening tests for CRC screening?
  - a. What factors influence your decision for choosing stool-based screening?
  - b. In what situations would a stool-based test be preferred over a colonoscopy?
  - c. What proportion of your patients do you think use stool-based screening? Has this number increased post-COVID?
  - d. Which type of stool-based test (or tests) do you use?
    - i. Are they mailed to patients? Provided during an office visit? Both?
    - ii. If both, what % are done by each method?
11. Do patients request stool-based screening?
12. What do you think of the new US Preventive Services Task Force (USPSTF) guidelines to start screening at age 45? How do you think this will be received by patients? What challenges do you anticipate around these new guidelines?
13. Does your organization track screening rates e.g., using benchmarks or reports? If so, can you share the general findings/rates?
  - a. Are benchmarks or reports stratified by any patient demographics, e.g., race, ethnicity, age, sex?

## Colorectal Cancer Follow-up

14. Is a potential need for a follow-up colonoscopy discussed with the patient at the time the stool-based test is ordered?
15. How is the result of the stool-based test communicated to you?
16. How is the result of the stool-based test communicated to the patient?
17. Are test results documented in the EHR, e.g., in a structured field, scanned report, clinical notes?
  - a. If in a structured field, is there more than one date documented? e.g., the date the test was ordered, result was received, or result was discussed with the patient? If only one date, how do you interpret the date?
18. What is the process for scheduling the follow-up colonoscopy after a positive stool-based test?
  - a. Is scheduling the follow-up colonoscopy offered at the time the positive stool-based results are provided to the patient? How does the scheduling occur?
  - b. Is there a recommended or required timeframe communicated to the patient for completing a follow-up colonoscopy?
  - c. How often do you think patients are adhering to this timeline?
19. Does your organization track time to follow-up colonoscopy e.g., using benchmarks or reports? If so, can you share the general findings/rates?
  - a. Are benchmarks or reports stratified by any patient demographics, e.g., race, ethnicity, age, sex?
20. Is cost or insurance coverage for a follow-up colonoscopy addressed at any point with the patient?
  - a. How do you, or how does your organization, bill for the colonoscopy, e.g., diagnostic or screening?

21. What are the biggest **barriers** you face regarding follow-up to a positive stool-based test?
  - a. At the patient level? (e.g., reluctance, lack of willingness to follow guidelines, fatalism, fear, time, transportation, etc.)
  - b. At the provider level? (e.g., lack of time to explain, lack of touchpoints, other health issue to prioritize, recent colonoscopy done, failure to inform patient of result, result attributed to false positive)
  - c. At the organizational level? (e.g., recommendations, no gastroenterology dept. or referral pathway, lack of appointments, technology, staffing shortages, language barriers between patients and providers)
  - d. External to the organization? (e.g., insurance coverage for diagnostic test)
22. What are the biggest **facilitators** to follow-up? (ask about each level)
  - a. At the patient level? (e.g., enthusiasm, knowledge, wanting to please provider, transportation assistance)
  - b. At the provider level? (e.g., timely informing patient of result, time to discuss preventive health with patients, plenty of access to appts.)
  - c. At the organizational level? (e.g., referral pathways, care gap reports, prevention culture of organization, emphasis on value-based care, care coordination, interpretation services or educational materials in different languages, appointment reminders)
  - d. External to the organization? (e.g., insurance assistance)

#### Patient Experience

23. Education
  - a. Who provides most of the education for patients on CRC screening and follow-up?
  - b. Is the patient portal used for this education?
  - c. Are flyers or reminders used?
24. What is the average age that you think your patients first get screened?
  - a. Does this differ by screening type, e.g., stool-based test vs. colonoscopy?
25. What prevents patients from timely screening, at the age they become eligible?
26. Do you think patients are aware of the new guidelines that lower the screening age to age 45?

#### Data Sharing

*Share overall findings for reactions and reflections*

27. Do these data align with your expectations, or are you surprised?
  - a. What about these data surprise you?

#### Success Factors (after seeing data)

##### Patient-level

28. In your opinion, what has the biggest impact on successful follow-up to a positive stool-based test? (Patient cooperation, education, convenience, etc.)?
29. Is there an emotional archetype associated with success?
30. Are there specific patient fears that prohibit success (fear of procedure, etc.)?
31. Any other patient-level factors that influence success that you have observed?

##### Provider-level

32. As a provider, what factors contribute to your success in patient adherence to follow-up to a positive stool-based test?

Organizational

33. How does your organization contribute to the success of follow-up to a positive stool-based test?

Overall Barriers & Facilitators - **OPTIONAL**

34. Of the **barriers** we have discussed—patient-level, provider-level, organizational, externally—which do you think are the largest or most important at this organization?
35. Of the **facilitators** we have discussed—patient-level, provider-level, organizational, externally—which do you think are the largest or most important at this organization?

Conclusion

36. Is there anything else that you would like to share on this topic?
37. Is there anything that I should have asked but did not?

Thank you for your participation in this interview. Your insights will help improve care for patients at risk for CRC. Feel free to contact anyone from the AMGA team if you have any further questions or comments!
