# Supplementary material for: Rates of Follow-up Colonoscopy After a Positive Stool-Based Screening Test Result for Colorectal Cancer Among Health Care Organizations in the US, 2017-2020
Source: PubMed Central journal article supplement — JAMA Netw Open. 2023 Jan 18;6(1):e2251384. doi: 10.1001/jamanetworkopen.2022.51384 (PMC9856942; doi:10.1001/jamanetworkopen.2022.51384), 2023-01-18
Supplement: jamanetwopen-e2251384-s002.pdf [file jamanetwopen-e2251384-s002.pdf]

## Data Sharing Statement

Mohl. Rates of Follow-up Colonoscopy After a Positive Stool-Based Screening Test Result for Colorectal Cancer Among Health Care Organizations in the US, 2017-2020. *JAMA Netw Open*. Published January 18, 2023. doi:10.1001/jamanetworkopen.2022.51384

### Data

**Data available:** No
